# Supplementary material for: Interplay between P-Glycoprotein Expression and Resistance to Endoplasmic Reticulum Stressors
Source: PubMed Central journal article supplement (PMC6017601; doi:10.3390/molecules23020337), 2018-02-06
Supplement: molecules-23-00337-s001.pdf [file molecules-23-00337-s001.pdf]

**Hano et al.:**

**Interplay between P-glycoprotein expression and resistance to endoplasmic reticulum stressors.**

**Supplementary files.**

**Table 1:** Comparison of ER stress-mediated responses to chemotherapy in resistant tumors

| Treatment                                   |                                                                                        | Cell line                                                                                                                                                    | ER stress related mechanism                                                                                                      | Cytotoxic effect                                                     |      |
|---------------------------------------------|----------------------------------------------------------------------------------------|--------------------------------------------------------------------------------------------------------------------------------------------------------------|----------------------------------------------------------------------------------------------------------------------------------|----------------------------------------------------------------------|------|
| Emodin                                      | PKC inhibitor                                                                          | Rat C6 glioma cells                                                                                                                                          | ↑BiP and CHOP expression                                                                                                         | ↑P-gp expression<br>↑resistance                                      | [1]  |
| Thapsigargin                                | SERCA inhibitor                                                                        | Mouse L1210 leukemia cells                                                                                                                                   | ↓Calnexin                                                                                                                        | ↓P-gp expression                                                     | [2]  |
| Rhabdovirus                                 | Oncolytic anticancer virus therapy                                                     | Human U373 glioblastoma cells<br><br>Various cell lines<br>Mice OVCAR-4 ovarian carcinoma<br>Glioblastoma patient samples,<br>mouse EMT6 breast cancer cells | IRE1α knockdown/inhibition (SA)<br>XBP-1 knockdown<br>IRE1α and ATF6 knockdown<br>IRE1α inhibition (SA)<br>IRE1α inhibition (SA) | ↑cytotoxicity<br>↓tumor growth                                       | [3]  |
| Imatinib                                    | BCR-ABL tyrosine kinase inhibitor                                                      | Mouse 32Dc13 and human K562 chronic myeloid leukemia cells                                                                                                   | ↓PERK/eIF2α phosphorylation                                                                                                      | ↓resistance                                                          | [4]  |
| Bortezomib                                  | Proteasome inhibitor                                                                   | Human KMS11 multiple myeloma cells                                                                                                                           | IRE1α and XBP-1 knockdown                                                                                                        | ↑resistance                                                          | [5]  |
| S1                                          | Pan-BH3 mimetic                                                                        | Human MCF-7 breast adenocarcinoma cells                                                                                                                      | ↑IRE1α expression                                                                                                                | no influence on P-gp expression<br>↑cytotoxicity                     | [6]  |
| Amprenavir                                  | HIV protease inhibitors                                                                | Mouse RAW 264.7 macrophages                                                                                                                                  | ↑CHOP, XBP-1, ATF4 expression                                                                                                    | ↓P-gp efflux activity                                                | [7]  |
| Ritonavir                                   |                                                                                        |                                                                                                                                                              |                                                                                                                                  | ↓berberine resistance                                                | [8]  |
| APO866<br>+ cyclosporine A                  | NAMPT inhibitor<br>+ P-gp inhibitor                                                    | Human B-CLL leukemia cells                                                                                                                                   | ↑IRE1α, CHOP, BiP expression                                                                                                     | P-gp inhibition<br>↑cytotoxicity                                     | [9]  |
| CAPE                                        | Anticancer drug                                                                        | Human MV3 melanoma cells                                                                                                                                     | ↑IRE1α, PERK phosphorylation                                                                                                     | ABCB5 inhibition<br>↑cytotoxicity                                    | [10] |
| Doxorubicin                                 | Anticancer drug                                                                        | Human HepG2/IR hepatoma cells                                                                                                                                | ↑BiP and PERK expression                                                                                                         | ↑P-gp expression<br>↑resistance                                      | [9]  |
| Nelfinavir                                  | HIV protease inhibitor                                                                 | Human MCF-7 breast adenocarcinoma cells                                                                                                                      | ↑PERK/eIF2α phosphorylation<br>↑BiP, CHOP expression                                                                             | ↓P-gp expression<br>↓P-gp efflux activity<br>↓doxorubicin resistance | [11] |
| Thapsigargin,<br>Tunicamycin<br>Brefeldin A | SERCA inhibitor<br>N-glycosylation inhibitor<br>Golgi-membrane translocation inhibitor | Human HT29 colon cancer cells                                                                                                                                | ↑PERK/Nrf2 expression                                                                                                            | ↑MRP1 expression<br>↑doxorubicin resistance                          | [12] |

ER, endoplasmic reticulum; P-gp, P-glycoprotein; MRP, multidrug resistance protein; GRP78, 78-kDa glucose-regulated protein; BiP, immunoglobulin binding protein; IRE1α, inositol-requiring enzyme 1α; XBP, X-box-binding protein; PERK, pancreatic endoplasmic reticulum kinase; eIF2α, eukaryotic initiation translation factor 2α; ATF, activating transcription factor; CHOP, C/EBP homologous protein; Nrf2, nuclear factor-erythroid 2-related factor 2; SA, salicylaldehyde analogs; CAPE, Caffeic acid phenethyl ester; PKC, protein kinase C; SERCA, sarco/endoplasmic reticulum Ca<sup>2+</sup>-ATPase; HIV, human immunodeficiency virus; NAMPT, nicotinamide phosphoribosyltransferase

## References

1. Kuo, T.C.; Yang, J.S.; Lin, M.W.; Hsu, S.C.; Lin, J.J.; Lin, H.J.; Hsia, T.C.; Liao, C.L.; Yang, M.D.; Fan, M.J., *et al.* Emodin has cytotoxic and protective effects in rat c6 glioma cells: Roles of mdr1a and nuclear factor kappa b in cell survival. *J Pharmacol Exp Ther* **2009**, *330*, 736-744.
2. Seres, M.; Ditte, P.; Breier, A.; Sulova, Z. Effect of thapsigargin on p-glycoprotein-negative and p-glycoprotein-positive I1210 mouse leukaemia cells. *Gen Physiol Biophys* **2010**, *29*, 396-401.
3. Mahoney, D.J.; Lefebvre, C.; Allan, K.; Brun, J.; Sanaei, C.A.; Baird, S.; Pearce, N.; Gronberg, S.; Wilson, B.; Prakesh, M., *et al.* Virus-tumor interactome screen reveals er stress response can reprogram resistant cancers for oncolytic virus-triggered caspase-2 cell death. *Cancer Cell* **2011**, *20*, 443-456.
4. Kusio-Kobialka, M.; Podrzywalow-Bartnicka, P.; Peidis, P.; Glodkowska-Mrowka, E.; Wolanin, K.; Leszak, G.; Seferynska, I.; Stoklosa, T.; Koromilas, A.E.; Piwocka, K. The perk-eif2alpha phosphorylation arm is a pro-survival pathway of bcr-abl signaling and confers resistance to imatinib treatment in chronic myeloid leukemia cells. *Cell Cycle* **2012**, *11*, 4069-4078.
5. Leung-Hagesteijn, C.; Erdmann, N.; Cheung, G.; Keats, J.J.; Stewart, A.K.; Reece, D.E.; Chung, K.C.; Tiedemann, R.E. Xbp1s-negative tumor b cells and pre-plasmablasts mediate therapeutic proteasome inhibitor resistance in multiple myeloma. *Cancer Cell* **2013**, *24*, 289-304.
6. Song, T.; Liang, F.; Zhang, Z.; Liu, Y.; Sheng, H.; Xie, M. S1 kills mcf-7/adr cells more than mcf-7 cells: A protective mechanism of endoplasmic reticulum stress. *Biomed Pharmacother* **2013**, *67*, 731-736.
7. Atkins, C.; Liu, Q.; Minthorn, E.; Zhang, S.Y.; Figueroa, D.J.; Moss, K.; Stanley, T.B.; Sanders, B.; Goetz, A.; Gaul, N., *et al.* Characterization of a novel perk kinase inhibitor with antitumor and antiangiogenic activity. *Cancer Res* **2013**, *73*, 1993-2002.
8. Bobrovnikova-Marjon, E.; Grigoriadou, C.; Pytel, D.; Zhang, F.; Ye, J.; Koumenis, C.; Cavener, D.; Diehl, J.A. Perk promotes cancer cell proliferation and tumor growth by limiting oxidative DNA damage. *Oncogene* **2010**, *29*, 3881-3895.
9. Cagnetta, A.; Caffa, I.; Acharya, C.; Soncini, D.; Acharya, P.; Adamia, S.; Pierri, I.; Bergamaschi, M.; Garuti, A.; Fraternali, G., *et al.* Apo866 increases antitumor activity of cyclosporin-a by inducing mitochondrial and endoplasmic reticulum stress in leukemia cells. *Clin Cancer Res* **2015**, *21*, 3934-3945.
10. El-Khattouti, A.; Sheehan, N.T.; Monico, J.; Drummond, H.A.; Haikel, Y.; Brodell, R.T.; Megahed, M.; Hassan, M. Cd133(+) melanoma subpopulation acquired resistance to caffeic acid phenethyl ester-induced apoptosis is attributed to the elevated expression of abcb5: Significance for melanoma treatment. *Cancer Lett* **2015**, *357*, 83-104.
11. Chakravarty, G.; Mathur, A.; Mallade, P.; Gerlach, S.; Willis, J.; Datta, A.; Srivastav, S.; Abdel-Mageed, A.B.; Mondal, D. Nelfinavir targets multiple drug resistance mechanisms to increase the efficacy of doxorubicin in mcf-7/dox breast cancer cells. *Biochimie* **2016**, *124*, 53-64.
12. Salaroglio, I.C.; Panada, E.; Moiso, E.; Buondonno, I.; Provero, P.; Rubinstein, M.; Kopecka, J.; Riganti, C. Perk induces resistance to cell death elicited by endoplasmic reticulum stress and chemotherapy. *Mol Cancer* **2017**, *16*, 91.
